# Supplementary material for: Detection of SARS-CoV-2 Variants via Different Diagnostics Assays Based on Single-Nucleotide Polymorphism Analysis
Source: MDPI journal article supplement (doi:10.3390/diagnostics13091573), 2023-04-27
Supplement: s1 [file s1]

**Table S2:** Typing of samples resulted undetermined or negative by TaqPath with Novaplex Variant VII assay.

| Sample code | TaqPath Results | RdRp gene | $\Delta 69/70$ | E484A | N501Y | Novaplex output |
|-------------|-----------------|-----------|----------------|-------|-------|-----------------|
| 13          | Undetermined    | 32.45     | 31.81          | 32.64 | 33.24 | Omi B.1.1.529   |
| 30          | Undetermined    | 32.31     | 32.78          | 34.01 | 33.82 | Omi B.1.1.529   |
| 34          | Undetermined    | 32.86     | 33.12          | 37.25 | 36.94 | Omi B.1.1.529   |
| 42          | Undetermined    | 32.30     | 32.83          | 33.20 | 33.37 | Omi B.1.1.529   |
| 43          | Undetermined    | 37.69     | 35.66          | 36.53 | 36.26 | Omi B.1.1.529   |
| 58          | Undetermined    | 35.95     | 35.95          | 36.79 | 36.4  | Omi B.1.1.529   |
| 64          | Undetermined    | 36.33     | 33.99          | 36.09 | 35.68 | Omi B.1.1.529   |
| 78          | Undetermined    | 35.22     | 35.45          | 37.46 | 37.07 | Omi B.1.1.529   |
| 79          | Undetermined    | 33.26     | N/A            | 35.21 | 35.04 | Omi BA.2        |
| 89          | Undetermined    | 33.66     | N/A            | 37.51 | 37.36 | Omi BA.2        |
| 96          | Undetermined    | 33.16     | 33.47          | 35.80 | 35.44 | Omi B.1.1.529   |
| 12          | NO_AMP          | 37.67     | N/A            | 32.91 | 32.99 | Omi BA.2        |
| 53          | NO_AMP          | 36.49     | N/A            | 37.52 | 37.18 | Omi BA.2        |
| 73          | NO_AMP          | 34.95     | N/A            | 37.72 | 37.44 | Omi BA.2        |
| 83          | NO_AMP          | 25.16     | 24.57          | 26.43 | 27.07 | Omi B.1.1.529   |

NO\_AMP, no amplification; Omi, Omicron;
