# Supplementary material for: Detection of SARS-CoV-2 Variants via Different Diagnostics Assays Based on Single-Nucleotide Polymorphism Analysis
Source: MDPI journal article supplement (doi:10.3390/diagnostics13091573), 2023-04-27
Supplement: s1 [file s1]

**Table S1:** Interpretation of Novaplex Variants VII Assay and Allplex Variants II Assay.

| Assay    | Mutation | Variants of Concern |         |       |           |            |           |                 |
|----------|----------|---------------------|---------|-------|-----------|------------|-----------|-----------------|
|          |          | Alpha               | Beta    | Gamma | Delta     | Delta Plus | Omicron   | Omicron Stealth |
|          |          | B.1.1.7             | B.1.351 | P.1   | B.1.617.2 | AY.1       | B.1.1.529 | BA2             |
| Novaplex | Δ69/70   | X                   |         |       |           |            | X         |                 |
|          | E484A    |                     |         |       |           |            | X         | X               |
|          | N501Y    | X                   | X       | X     |           |            | X         | X               |
|          | RdRP     | X                   | X       | X     | X         | X          | X         | X               |
| Allplex  | W152C    |                     |         |       |           |            |           |                 |
|          | K417N    |                     | X       |       |           | X          | X         | X               |
|          | K417T    |                     |         | X     |           |            |           |                 |
|          | L452R    |                     |         |       | X         | X          |           |                 |
